# Supplementary material
Source: PubMed Central journal article supplement (PMC3806910)
Supplement: supp_WNL.0b013e3182a393d1_e-References.pdf [file supp_WNL.0b013e3182a393d1_e-References.pdf]

## **E-References**

- e1. Cukiert A, Mariani PP, Burattini JA, et al. Parkinsonism induced by VNS in a child with double-cortex syndrome. *Epilepsia* 2009;50:2667–2669.
- e2. St Louis EK, Faber K. Reversible sleep-related stridor during vagus nerve stimulation. *Epileptic Disord* 2010;12:76–80.
- e3. Hajnšek S, Šulentić V, Samaržija M, et al. Bronchoconstriction induced by vagus nerve stimulation for the management of pharmaco-resistant epilepsy in a patient with bronchial asthma: case report. *Neurologia Croatica* 2010;59:89–93.
- e4. El Tahry R, De Herdt V, Raedt R, et al. Evolution in VNS therapy for refractory epilepsy, experience with Demipulse devices at Ghent University Hospital. *Seizure* 2010;19:531–535.
- e5. Gerson R, Murray E, Price B, Frankel M, Douglass LM, Cunningham M. Mania following vagus nerve stimulation: a case report and review of the literature. *Epilepsy Behav* 2011;20:138–140.
- e6. Murr NI, Azar NJ. Severe new seizures after initiation of vagus nerve stimulation therapy. *Epilepsy Behav* 2011;22:398–400.
- e7. Spitz MC, Winston KR, Maa EH, Ojemann SG. Insulation discontinuity in a vagus nerve stimulator lead: a treatable cause of intolerable stimulation-related symptoms. *J Neurosurg* 2010;112:829–831.
- e8. Marzec M, Edwards J, Sagher O, Fromes G, Malow BA. Effects of vagus nerve stimulation on sleep-related breathing in epilepsy patients. *Epilepsia* 2003;44:930–935.
- e9. Ebben MR, Sethi NK, Conte M, Pollak CP, Labar D. Vagus nerve stimulation, sleep apnea, and CPAP titration. *J Clin Sleep Med* 2008;4:471–473.

- e10. Amar AP, DeGiorgio CM, Tarver WB, Apuzzo ML. Long-term multicenter experience with vagus nerve stimulation for intractable partial seizures: results of the XE5 trial. *Stereotact Funct Neurosurg* 1999;73:104–108.
- e11. Kawai K, Shimuzu H, Maehara T, Murakami H. Outcome of long-term vagus nerve stimulation for intractable epilepsy. *Neurol Med Chir (Tokyo)* 2002;42:481–490.
- e12. Annegers JF, Coan SP, Hauser WA, Leestma J. Epilepsy, vagal nerve stimulation by the NCP system, all-cause mortality, and sudden, unexpected, unexplained death. *Epilepsia* 2000;41:549–553.
- e13. Smyth MD, Tubbs RS, Bebin EM, Grabb PA, Blount JP. Complications of chronic vagus nerve stimulation in children. *J Neurosurg* 2003;99:500–503.
- e14. Kirse DJ, Werle AH, Murphy JV, et al. Vagus nerve stimulator implantation in children. *Arch Otolaryngol Head Neck Surg* 2002;128:1263–1268.
- e15. Kabir SM, Rajaraman C, Rittey C, Zaki HS, Kemeny AA, McMullan J. Vagus nerve stimulation in children with intractable epilepsy: indications, complications and outcome. *Childs Nerv Syst* 2009;25:1097–1100.
- e16. Handforth A, De Giorgio CM, Schachter SC, et al. Vagus nerve stimulation therapy for partial-onset seizures: a randomized active-control trial. *Neurology* 1998;51:48–55.
- e17. Holmes MD, Silbergeld DL, Drouhard D, Wilensky AJ, Ojemann LM. Effect of vagus nerve stimulation on adults with pharmaco-resistant generalized epilepsy syndromes. *Seizure* 2004;13:340–345.
