# Supplementary material
Source: PubMed Central journal article supplement (PMC3806910)
Supplement: supp_WNL.0b013e3182a393d1_Tables_e-1-3.pdf [file supp_WNL.0b013e3182a393d1_Tables_e-1-3.pdf]

Tables e-1 through e-3

Table e-1: Efficacy

| Author, year                         | Population                              | Seizure types                                  | Outcome assessment and study characteristics (including duration of study) | Seizure change                                                                                                                                                                                                                                                                                                           | Seizure free | Number turned off and/or explanted due to lack of efficacy |
|--------------------------------------|-----------------------------------------|------------------------------------------------|----------------------------------------------------------------------------|--------------------------------------------------------------------------------------------------------------------------------------------------------------------------------------------------------------------------------------------------------------------------------------------------------------------------|--------------|------------------------------------------------------------|
| <b>Alexopoulos, 2006<sup>3</sup></b> | N=46<br>Ages 2–18 years;<br>median 12.1 | Partial, generalized, and LG seizures included | Patient and family seizure diaries; median follow-up 2 years               | As compared with baseline, median seizure frequency reduction in the setting of declining numbers was 56% at 3 months (n=46), 50% at 6 months (n=45), 63% at 12 months (n=39), 83% at 24 months (n=23), and 74% at 36 months (n=16); median follow-up was 2 years; no change in number of AEDs used before and after VNS | 5            | 6                                                          |
| <b>Benifla, 2006<sup>4</sup></b>     | N=40<br>Ages 3–19 years;<br>mean age 13 | Partial epilepsy and LG seizures               | Parental report; median follow-up 31 months                                | 15 (41%) reported a >90% seizure frequency reduction, 3 more reported at least a 50% seizure frequency reduction for a total of 18 (45%); an additional 3 patients had a more than 25% but less than 50% seizure frequency reduction. However, 20 patients had no significant                                            | Not reported | 2                                                          |

| Author, year                      | Population                                                                      | Seizure types                                                                                             | Outcome assessment and study characteristics (including duration of study)                                                   | Seizure change                                                                                                                                                                                                                                                                                                                   | Seizure free | Number turned off and/or explanted due to lack of efficacy |
|-----------------------------------|---------------------------------------------------------------------------------|-----------------------------------------------------------------------------------------------------------|------------------------------------------------------------------------------------------------------------------------------|----------------------------------------------------------------------------------------------------------------------------------------------------------------------------------------------------------------------------------------------------------------------------------------------------------------------------------|--------------|------------------------------------------------------------|
|                                   |                                                                                 |                                                                                                           |                                                                                                                              | seizure frequency change.                                                                                                                                                                                                                                                                                                        |              |                                                            |
| <b>Hallböök, 2005<sup>5</sup></b> | N=15<br>Ages 4–17 years,<br>median 11                                           | Partial with and without secondary generalization, generalized tonic-clonic, atonic, and atypical absence | Seizure diaries; AEDs stable during study period. Duration 9 months: VNS settings stable for the last 8 months of the study. | The seizure frequency decreased 50% or more in 6/15 children; seizure frequency decreased between 25% and 50% in 2 and decreased less than 25% in 4. Seizure frequency increased in 2 patients and was unchanged in 1. Median seizure frequency reduction was 65% ( $p = 0.02$ ) at 3 months and 63% ( $p = 0.04$ ) at 9 months. | 1            | None                                                       |
| <b>Kang, 2006<sup>6</sup></b>     | N=16<br>Ages 2 years 5 months to 17 years, 11 months; mean age 9 years 3 months | Partial epilepsy, secondary generalized, and 11 with LG seizures                                          | Seizure diaries; duration of follow-up at least 12 months                                                                    | >50% frequency reduction in 50% (8/16) of children; 5/16 had 90% seizure frequency reduction at last follow-up                                                                                                                                                                                                                   | 2            | None                                                       |
| <b>Parain, 2001<sup>17</sup></b>  | N=10<br>Ages 54-                                                                | Complex partial and generalized                                                                           | Seizure diaries; meds could be                                                                                               | 1 no change, 9 >50% seizure frequency reduction, 5/9 >90%;                                                                                                                                                                                                                                                                       | None         | None                                                       |

| Author, year                       | Population                                                 | Seizure types                                            | Outcome assessment and study characteristics (including duration of study) | Seizure change                                                                                                                                                                          | Seizure free                                                                                                                                                               | Number turned off and/or explanted due to lack of efficacy |
|------------------------------------|------------------------------------------------------------|----------------------------------------------------------|----------------------------------------------------------------------------|-----------------------------------------------------------------------------------------------------------------------------------------------------------------------------------------|----------------------------------------------------------------------------------------------------------------------------------------------------------------------------|------------------------------------------------------------|
|                                    | 20; mean age 13, median age 15                             | tonic-clonic seizures associated with tuberous sclerosis | changed as needed during the study                                         | follow-up was 6 months                                                                                                                                                                  |                                                                                                                                                                            |                                                            |
| <b>Rossignol, 2009<sup>7</sup></b> | N=28<br>Ages 3.5–21 years; no mean or median age available | Multiple seizure types; most very severe                 | Seizure diaries; AEDs unchanged for the first 6 months                     | 75% (21/28) had >50% seizure frequency reduction at 6 months. 68% (19/28) had ≥50% reduction in seizure frequency, including 14% (4/28) who became seizure-free at 24 months follow-up. | 4 at 24 months after implant; 1 patient with childhood absence, 1 patient with partial seizures of the frontal lobe, 1 patient with LGS, and 1 patient with Doose syndrome | None, but did not improve seizures in 2 patients           |

| Author, year                        | Population                                                                                            | Seizure types                                                                                   | Outcome assessment and study characteristics (including duration of study)                                                                                           | Seizure change                                                                                                                                                                                                                                                                                                                                                                                                             | Seizure free | Number turned off and/or explanted due to lack of efficacy |
|-------------------------------------|-------------------------------------------------------------------------------------------------------|-------------------------------------------------------------------------------------------------|----------------------------------------------------------------------------------------------------------------------------------------------------------------------|----------------------------------------------------------------------------------------------------------------------------------------------------------------------------------------------------------------------------------------------------------------------------------------------------------------------------------------------------------------------------------------------------------------------------|--------------|------------------------------------------------------------|
| <b>Colicchio, 2010<sup>11</sup></b> | 18 children implanted at ages 0–6 years, 32 at ages 7–12 years, 31 at ages 13–18 years, and 54 adults | Multiple seizure types, including severe multifocal epilepsy, LG seizures, and partial epilepsy | Seizure diaries; follow-up ranged from 6–36 months, with 121 patients at 12 months, 99 patients at 18 months, 87 patients at 24 months, and 78 patients at 36 months | 3 months postimplantation overall seizure reduction of 38.2%, and the 50% responder rates at 3, 6, 12, 18, 24 and 36 months were 27.5%, 26.6%, 36.7%, 42.6%, 41.6%, and 49.2%, respectively. There was a statistically significant increase between 6 and 12 months (McNemar test $p=0.04$ ). The rate of seizure-free patients tended to increase over time: 2.4% at 12 months, 4.5% at 24 months, and 5.1% at 36 months. | 2            | None                                                       |

| Author, year                                  | Population                                                                                                            | Seizure types              | Outcome assessment and study characteristics (including duration of study)            | Seizure change                                                                          | Seizure free                 | Number turned off and/or explanted due to lack of efficacy |
|-----------------------------------------------|-----------------------------------------------------------------------------------------------------------------------|----------------------------|---------------------------------------------------------------------------------------|-----------------------------------------------------------------------------------------|------------------------------|------------------------------------------------------------|
| <b>Majkowska-Zwolińska, 2012<sup>12</sup></b> | 57 adolescents with epilepsy (mean age 11.4 ± 3.85 years; all were less than 18 years and 34 were less than 12 years) | Most with partial epilepsy | Seizure diaries; 2-year follow-up in 54 patients; AEDs were held stable in this study | 52% seizure frequency reduction at 12 months and a 50% responder rate of 55% at 2 years | 9.3% seizure free at 2 years | None                                                       |

| Author, year                      | Population                                                                    | Seizure types                | Outcome assessment and study characteristics (including duration of study)                                                                   | Seizure change                                                                                                                                                                                                                           | Seizure free | Number turned off and/or explanted due to lack of efficacy |
|-----------------------------------|-------------------------------------------------------------------------------|------------------------------|----------------------------------------------------------------------------------------------------------------------------------------------|------------------------------------------------------------------------------------------------------------------------------------------------------------------------------------------------------------------------------------------|--------------|------------------------------------------------------------|
| <b>Wheeler, 2011<sup>13</sup></b> | 189 patients with mainly partial epilepsies (of which 45 were ≤ 20 years old) | Most with partial epilepsies | Seizure diaries used; at least 12 months of follow-up with a mean of 41 months; the results were evaluated in terms of Engel classifications | Of the 45 predominantly pediatric cases, 6 (13%) had a Class I or II outcome (no or rare disabling seizures), 17 (38%) had a Class III outcome (worthwhile improvement), and 22 (49%) had a Class IV outcome (no worthwhile improvement) | Not reported | Not reported                                               |

| Author, year                     | Population                                    | Seizure types                           | Outcome assessment and study characteristics (including duration of study) | Seizure change                                                                                                                                                                                                                                        | Seizure free | Number turned off and/or explanted due to lack of efficacy                                   |
|----------------------------------|-----------------------------------------------|-----------------------------------------|----------------------------------------------------------------------------|-------------------------------------------------------------------------------------------------------------------------------------------------------------------------------------------------------------------------------------------------------|--------------|----------------------------------------------------------------------------------------------|
| <b>Shahwan, 2009<sup>8</sup></b> | N=26<br>Age range 5–16 years, median age 11.8 | Multiple seizure types                  | Seizure diaries                                                            | 54% of patients responded to VNS with $\geq 50\%$ seizure frequency reduction. Patients with LGS and tonic seizures had a higher responder rate; 78% (7 of 9 patients) ( $p < 0.01$ ). Follow-up minimum 18 months (up to 8.5 years; median 3 years). | None         | 4, 2 of whom also had adverse effects (aggravation of behavioral problems and side effects ) |
| <b>Zamponi, 2011<sup>9</sup></b> | N=39<br>Mean age 13 years,                    | Drop attacks in all patients, LGS in 14 | Seizure diaries followed for 3 years; AEDs                                 | 17 had $\geq 50\%$ frequency reduction at 1 year and 9 were unchanged. Two patients were                                                                                                                                                              | 2            | 3                                                                                            |

| Author, year                        | Population                                                                            | Seizure types                                                                                                               | Outcome assessment and study characteristics (including duration of study) | Seizure change                                                                                                                                                                                                                  | Seizure free                                                    | Number turned off and/or explanted due to lack of efficacy |
|-------------------------------------|---------------------------------------------------------------------------------------|-----------------------------------------------------------------------------------------------------------------------------|----------------------------------------------------------------------------|---------------------------------------------------------------------------------------------------------------------------------------------------------------------------------------------------------------------------------|-----------------------------------------------------------------|------------------------------------------------------------|
|                                     | range 2–51 years; including 3 patients over 18 years: ages 20, 30 and 51 years        |                                                                                                                             | unchanged                                                                  | seizure free. The average reduction was 41% at 6 months, 50% at 12 months, and 54% at 36 months. Frequency of 50% responders was significantly greater in the non-LGS group (52%) compared to the LGS group (21%) ( $p=0.01$ ). |                                                                 |                                                            |
| <b>Sherman, 2008</b> <sup>10</sup>  | N=34<br>Mean age 12.3, range 3–18                                                     | 16 partial, 17 generalized.<br>5 with LG                                                                                    | Seizure diaries; followed for 1 year                                       | 14 patients had >50% seizure frequency reduction and 1 was seizure free                                                                                                                                                         | 1                                                               | Not reported                                               |
| <b>Elliott, 2011</b> <sup>14</sup>  | N=141<br>Mean age 11.1, age range 1–18; 86 patients under 12; 55 patients 12 or older | 39% with multifocal partial epilepsy, 29% with symptomatic generalized epilepsy, 13.5% with idiopathic generalized epilepsy | Seizure logs; followed for mean of 5.2 years (range 25 days to 11.4 years) | Of the 128 patients who had follow-up data, 64.8% had >50% seizure frequency reduction                                                                                                                                          | 10 or 7.8% seizure free for at least 6 months at last follow-up | 8                                                          |
| <b>Pastrana, 2011</b> <sup>15</sup> | N=13<br>Mean age 12, range                                                            | Various seizure types, however most patients had                                                                            | Seizure diaries; followed for a minimum of 9                               | 54% (7/13) had a 50% or greater reduction in seizure frequency; 3 patients had no                                                                                                                                               | 1                                                               | None                                                       |



| Author, year                     | Population                                                    | Seizure types                                         | Outcome assessment and study characteristics (including duration of study) | Seizure change                                                                                                                                                                                                                                                                                                                                                              | Seizure free | Number turned off and/or explanted due to lack of efficacy |
|----------------------------------|---------------------------------------------------------------|-------------------------------------------------------|----------------------------------------------------------------------------|-----------------------------------------------------------------------------------------------------------------------------------------------------------------------------------------------------------------------------------------------------------------------------------------------------------------------------------------------------------------------------|--------------|------------------------------------------------------------|
|                                  | 6–18 years                                                    | generalized tonic-clonic and complex partial seizures | months                                                                     | benefit                                                                                                                                                                                                                                                                                                                                                                     |              |                                                            |
| <b>Majoie, 2005<sup>19</sup></b> | N=19<br>Mean age 10.8 years, range 5.9–18.8                   | LG seizures                                           | Patient report; AEDs unchanged in the first 12 months                      | 21% (4/19) had seizure reduction of $\geq 50\%$ , 20.6% reduction in seizure frequency at 12 months                                                                                                                                                                                                                                                                         | 1            | None                                                       |
| <b>Kostov, 2009<sup>20</sup></b> | N=30<br>Mean age 13 years, range 4–52; 18 were under 18 years | LG seizures                                           | Patient report                                                             | Seizure frequency reduction rates for atonic seizures were 80.2% (8/12) and for tonic seizures were 73.3% (8/13) during a mean follow-up of 52 months. The frequency of disabling seizures fell from 77.5 monthly to 22.5 monthly. For generalized tonic-clonic seizures, 11/20 or 57.4% were responders. Numbers of AEDs used were significantly reduced during the study. | 1            | 4                                                          |
| <b>You, 2008<sup>21</sup></b>    | N=10<br>Ages not provided                                     | LG seizures                                           | Seizure diaries; duration of follow-up 1–7 years                           | 7/10 had $>50\%$ seizure frequency reduction; 2/10 had $>75\%$ seizure frequency reduction                                                                                                                                                                                                                                                                                  | None         | None reported                                              |

| Author, year                        | Population                                                                                   | Seizure types                                | Outcome assessment and study characteristics (including duration of study) | Seizure change                                                                                                                                       | Seizure free | Number turned off and/or explanted due to lack of efficacy |
|-------------------------------------|----------------------------------------------------------------------------------------------|----------------------------------------------|----------------------------------------------------------------------------|------------------------------------------------------------------------------------------------------------------------------------------------------|--------------|------------------------------------------------------------|
| <b>Cersósimo, 2011<sup>22</sup></b> | N=20<br>Mean age 12.5, range 5–19 years                                                      | LGS                                          | Seizure diaries; follow-up for 36 months                                   | 16/20 had at least a 50% seizure frequency reduction                                                                                                 | None         | None                                                       |
| <b>Zamponi, 2011<sup>18</sup></b>   | N=8<br>Mean age 10.28 years, range 5–25                                                      | Dravet syndrome                              | Seizure diaries used; 12-month follow-up                                   | Mean seizure rate reduction of 12% at 3 months, 6% at 6 months, and 31% at 12 months                                                                 | None         | None reported                                              |
| <b>Zamponi, 2010<sup>16</sup></b>   | N=11<br>Age range 2–35 years, median age 14; 2 subjects older than 19 years (ages 27 and 35) | Tuberous sclerosis                           | Seizure diaries used; 12-month follow-up                                   | Mean seizure rate reduction of 43% at 3 months (median 40%), 52% at 9 months (median 50%), and 58% at 12 months (median 50%)                         | None         | None reported                                              |
| <b>Elger, 2000<sup>23</sup></b>     | N=11                                                                                         | Adult patients with complex partial epilepsy | Patients used self-rated scales; 3 and 6 months follow-up                  | Most scales and subscales at the 3-month follow-up improved ( $p<0.05$ ). Mood improvements were sustained at the 6-month follow-up (9/11 subjects). |              |                                                            |
| <b>Harden, 2000<sup>24</sup></b>    | N=20                                                                                         | Adults with                                  | Patients used                                                              | <i>t</i> tests for change in subject-                                                                                                                |              |                                                            |

| Author, year                     | Population               | Seizure types                | Outcome assessment and study characteristics (including duration of study) | Seizure change                                                                                                                                                                                                                                       | Seizure free | Number turned off and/or explanted due to lack of efficacy |
|----------------------------------|--------------------------|------------------------------|----------------------------------------------------------------------------|------------------------------------------------------------------------------------------------------------------------------------------------------------------------------------------------------------------------------------------------------|--------------|------------------------------------------------------------|
|                                  |                          | epilepsy                     | self-rated scales; 3-month follow-up                                       | rated scales: Cornell Dysthymia Rating Scale improved ( $p = 0.001$ ), Beck Depression Index improved ( $p = 0.045$ )                                                                                                                                |              |                                                            |
| <b>Morris, 1999<sup>25</sup></b> | N=440                    | Adults with partial epilepsy | From phase III clinical trials; seizure diaries used                       | A $\geq 50\%$ seizure reduction postimplantation occurred in 36.8% of patients at 1 year, in 43.2% at 2 years, and in 42.7% at 3 years. Median seizure reductions compared with baseline were 35% at 1 year, 44.3% at 2 years, and 44.1% at 3 years. |              |                                                            |
| <b>Kuba, 2009<sup>26</sup></b>   | N=90<br>Ages 13–64 years | Multiple seizure types       | Patient diaries                                                            | >50% seizure frequency reduction in 41% at 1 year, in 53.2% of 87 patients at 2 years, and in 48.9% at 5 years                                                                                                                                       |              |                                                            |

AEDs = antiepileptic drugs; LG = Lennox-Gastaut; LGS = Lennox-Gastaut syndrome; VNS = vagus nerve stimulation.

**Table e-2: Adverse effects in children**

| <b>Author, year</b>                  | <b>Population</b>                       | <b>Method of obtaining adverse effects</b>                     | <b>No. wound infections/no. explanted due to wound infections</b> | <b>Other adverse effects</b>                                                                                                                                                                                                         | <b>Explanted or turned off due to adverse effects</b>                                    |
|--------------------------------------|-----------------------------------------|----------------------------------------------------------------|-------------------------------------------------------------------|--------------------------------------------------------------------------------------------------------------------------------------------------------------------------------------------------------------------------------------|------------------------------------------------------------------------------------------|
| <b>Alexopoulos, 2006<sup>3</sup></b> | N=46<br>Ages 2–18 years;<br>median 12.1 | Standardized forms to document reason for treatment withdrawal | 5/4                                                               | 56% experienced mild and transient symptoms such as hoarseness, throat pain, drooling, or cough that did not require device removal. These symptoms limited changes of the generator’s stimulation settings in 3/46 patients (6.5%). | None                                                                                     |
| <b>Benifla, 2006<sup>4</sup></b>     | N=40<br>Ages 3–19 years; mean age 13    | Chart review and parent report                                 | 2/1                                                               | 13 patients reported voice change or cough and 1 reported pain. 1 patient had sleep problems and 3 had worsening behavior. Most were managed with adjusting VNS settings.                                                            | 2 had the device removed due to adverse effects; 1 due to voice change and 1 due to pain |
| <b>Hallböök, 2005<sup>5</sup></b>    | N=15<br>Ages 4–17 years,                | Families were specifically                                     | None                                                              | 4 with coughing and hoarseness, 1 with persistent pain in                                                                                                                                                                            | Patient with persistent pain had VNS turned                                              |

| <b>Author, year</b>                | <b>Population</b>                                                                  | <b>Method of obtaining adverse effects</b> | <b>No. wound infections/no. explanted due to wound infections</b> | <b>Other adverse effects</b>                                                                                                                                                 | <b>Explanted or turned off due to adverse effects</b>                                                      |
|------------------------------------|------------------------------------------------------------------------------------|--------------------------------------------|-------------------------------------------------------------------|------------------------------------------------------------------------------------------------------------------------------------------------------------------------------|------------------------------------------------------------------------------------------------------------|
|                                    | median 11                                                                          | queried for adverse effects                |                                                                   | neck, 1 with weight loss                                                                                                                                                     | off after study completion                                                                                 |
| <b>Kang, 2006<sup>6</sup></b>      | N=16<br>Ages 2 years 5 months to 17 years, 11 months;<br>mean age 9 years 3 months | Not stated                                 | 1/none                                                            | 1 with hoarseness and wound infection that required revision of the wound site, 1 with excessive salivation, 1 with dyspnea during sleep                                     | 1 patient had device explanted due to generator malfunction                                                |
| <b>Parain, 2001<sup>17</sup></b>   | N=10<br>Ages 54-20;<br>mean age 13, median age 15                                  | Not stated                                 | None/none                                                         | Coughing occurred in unspecified number of patients; 1 patient had temporary exacerbation of psychotic behavior shortly after implantation                                   | None                                                                                                       |
| <b>Rossignol, 2009<sup>7</sup></b> | N=28<br>Ages 3.5–21 years; no mean or median age available                         | Not stated                                 | 2/2, but VNS was reimplanted within several months                | 68% (19/28) reported adverse effects, mostly throat pain, voice change, chest discomfort, local thoracic pain at site of VNS battery, dyspnea, coughing or mild dysphagia; 1 | 3; 2 for pain at site (both had VNS reimplanted within several months) and 1 patient with severe dysphagia |

| Author, year                                  | Population                                                                                                                | Method of obtaining adverse effects | No. wound infections/no. explanted due to wound infections | Other adverse effects                                                                                                                                                                                            | Explanted or turned off due to adverse effects |
|-----------------------------------------------|---------------------------------------------------------------------------------------------------------------------------|-------------------------------------|------------------------------------------------------------|------------------------------------------------------------------------------------------------------------------------------------------------------------------------------------------------------------------|------------------------------------------------|
|                                               |                                                                                                                           |                                     |                                                            | severely disabled patient died from upper airway obstruction while eating unattended 2 months after VNS placement                                                                                                |                                                |
| <b>Colicchio, 2010<sup>11</sup></b>           | 18 children implanted at ages 0–6 years, 32 at ages 7–12 years, 31 at ages 13–18 years, and 54 adults                     |                                     | None reported                                              | None reported                                                                                                                                                                                                    | None reported                                  |
| <b>Majkowska-Zwolińska, 2012<sup>12</sup></b> | 57 adolescents with epilepsy (mean age $11.4 \pm 3.85$ years; all were less than 18 years and 34 were less than 12 years) |                                     | None                                                       | Adverse effects included intermittent hoarseness of voice in 14 (25.0%), persistent hoarseness in 2 (3.6%), intermittent cough in 10 (17.9%), local pain and intermittent paresthesia in 9 (16.1%), intermittent | None                                           |

| Author, year                      | Population                                                                    | Method of obtaining adverse effects | No. wound infections/no. explanted due to wound infections | Other adverse effects                                                                                                                                                                                                                                                                    | Explanted or turned off due to adverse effects                                                            |
|-----------------------------------|-------------------------------------------------------------------------------|-------------------------------------|------------------------------------------------------------|------------------------------------------------------------------------------------------------------------------------------------------------------------------------------------------------------------------------------------------------------------------------------------------|-----------------------------------------------------------------------------------------------------------|
|                                   |                                                                               |                                     |                                                            | dyspnea in 1 (1.8%), aggressive behavior in 2 (3.6%), and vomiting and dysphagia in 1 (1.8%)                                                                                                                                                                                             |                                                                                                           |
| <b>Wheeler, 2011<sup>13</sup></b> | 189 patients with mainly partial epilepsies (of which 45 were ≤ 20 years old) |                                     | Not reported                                               | Not reported                                                                                                                                                                                                                                                                             | Not reported                                                                                              |
| <b>Shahwan, 2009<sup>8</sup></b>  | N=26<br>Age range 5–16 years, median age 11.8                                 | Data collected on a diary           | None/none                                                  | Throat discomfort in 3 patients, weight loss in 3 patients, and dyspnea in 1 patient. Transient left vocal cord paresis also occurred; however, the number of patients who experienced this was not reported. Behavioral problems occurred in 6 patients, 4 of whom became seizure free. | 2 were explanted due to lack of efficacy but 1 also had behavioral problems and the other had weight loss |

| <b>Author, year</b>               | <b>Population</b>                                                                                         | <b>Method of obtaining adverse effects</b> | <b>No. wound infections/no. explanted due to wound infections</b> | <b>Other adverse effects</b>                                                                                             | <b>Explanted or turned off due to adverse effects</b> |
|-----------------------------------|-----------------------------------------------------------------------------------------------------------|--------------------------------------------|-------------------------------------------------------------------|--------------------------------------------------------------------------------------------------------------------------|-------------------------------------------------------|
| <b>Zamponi, 2011<sup>9</sup></b>  | N=39<br>Mean age 13 years, range 2–51 years; including 3 patients over 18 years: ages 20, 30 and 51 years | None stated                                | None/none                                                         | Mild transient “chronic side effect stimulation” occurred in an unspecified number of patients                           | 1 who also had lack of efficacy                       |
| <b>Zamponi, 2010<sup>16</sup></b> | N=11<br>Age range 2–35 years, median age 14; 2 subjects older than 19 years (ages 27 and 35)              |                                            | None                                                              | 1 patient had transient cough and vomiting during the first 3 months after the implant                                   | None                                                  |
| <b>Sherman, 2008<sup>10</sup></b> | N=34<br>Mean age 12.3, range 3–18                                                                         | None stated                                | Not reported                                                      | Not reported                                                                                                             | Not reported                                          |
| <b>Elliott, 2011<sup>14</sup></b> | N=141<br>Mean age 11.1, age range 1–18; 86 patients under 12; 55                                          |                                            | 4/1                                                               | 85 patients were under age 12; 55 patients were age 12 or older. The adverse effects were presented in terms of this age | None                                                  |



| Author, year                       | Population                         | Method of obtaining adverse effects | No. wound infections/no. explanted due to wound infections | Other adverse effects                                                                                                                                                                                                                                                                                                                                                                                                                                     | Explanted or turned off due to adverse effects |
|------------------------------------|------------------------------------|-------------------------------------|------------------------------------------------------------|-----------------------------------------------------------------------------------------------------------------------------------------------------------------------------------------------------------------------------------------------------------------------------------------------------------------------------------------------------------------------------------------------------------------------------------------------------------|------------------------------------------------|
|                                    | patients 12 or older               |                                     |                                                            | cut-off. 2 patients below age 12 had neurologic complications (hoarseness and cough in 1 each); hoarseness was present in 1 child older than 12. No child under 12 had neck pain, but 1 child older than 12 had neck pain. 1 superficial infection treated with antibiotics occurred in both age groups, and 1 deep infection requiring removal occurred in the under 12 group. 1 seroma/hematoma and 1 pneumothorax occurred in the older than 12 group. |                                                |
| <b>Pastrana, 2011<sup>15</sup></b> | N=13<br>Mean age 12,<br>range 6–18 |                                     | 1 surgical complication (a partial wound                   | None reported                                                                                                                                                                                                                                                                                                                                                                                                                                             | None                                           |

| <b>Author, year</b>                 | <b>Population</b>                                             | <b>Method of obtaining adverse effects</b> | <b>No. wound infections/no. explanted due to wound infections</b> | <b>Other adverse effects</b>                                                                                                                  | <b>Explanted or turned off due to adverse effects</b>                                                                            |
|-------------------------------------|---------------------------------------------------------------|--------------------------------------------|-------------------------------------------------------------------|-----------------------------------------------------------------------------------------------------------------------------------------------|----------------------------------------------------------------------------------------------------------------------------------|
|                                     | years                                                         |                                            | dehiscence treated with IV antibiotics and debridement)           |                                                                                                                                               |                                                                                                                                  |
| <b>Majoie, 2005<sup>19</sup></b>    | N=19<br>Mean age 10.8 years, range 5.9–18.8                   |                                            | None/none                                                         | Coughing in 4, tingling sensation in 2                                                                                                        | None                                                                                                                             |
| <b>Kostov, 2009<sup>20</sup></b>    | N=30<br>Mean age 13 years, range 4–52; 18 were under 18 years |                                            | 1/1                                                               | Drooling and voice alteration were the most frequent adverse effects (6/30); a single patient reported enuresis, light sensitivity, and fever | 1 case of vocal cord paralysis occurred, with recovery after VNS was turned off, but eventually was explanted due to this effect |
| <b>You, 2008<sup>21</sup></b>       | N=10<br>Ages not provided                                     |                                            | None/none                                                         | 1 patient with dyspnea while sleeping and 1 with drooling                                                                                     | None                                                                                                                             |
| <b>Cersósimo, 2011<sup>22</sup></b> | N=20<br>Mean age 12.5, range 5–19 years                       |                                            | 2/1                                                               | Transient hoarseness in the majority                                                                                                          | None                                                                                                                             |
| <b>Smyth, 2003<sup>e13</sup></b>    | N=74<br>Mean age 8.8                                          |                                            | 6/3<br>Infectious                                                 | 2 with electrode fracture, 1 with                                                                                                             | 4 (5.4%) were removed for                                                                                                        |

| Author, year                     | Population                                                                                            | Method of obtaining adverse effects | No. wound infections/no. explanted due to wound infections                                                                                                                                                                                                 | Other adverse effects                                                                                                                                                                                                                                                           | Explanted or turned off due to adverse effects                                                                                                 |
|----------------------------------|-------------------------------------------------------------------------------------------------------|-------------------------------------|------------------------------------------------------------------------------------------------------------------------------------------------------------------------------------------------------------------------------------------------------------|---------------------------------------------------------------------------------------------------------------------------------------------------------------------------------------------------------------------------------------------------------------------------------|------------------------------------------------------------------------------------------------------------------------------------------------|
|                                  | years, range 11 months–18 years with a minimum follow-up of 1 year and a mean follow-up of 2.2 years  |                                     | surgical complications occurred in 6/74 or 7.1% overall, including deep infection in 3 (3.6%) which required explantation. 2 with superficial infection were treated with oral antibiotics and 1 was treated with IV antibiotics and surgical debridement. | ipsilateral vocal cord paralysis. 1 patient each reported hoarseness, cough, involuntary arm movement, inappropriate laughter, drooling, torticollis, and urinary retention. 1 of the 2 electrode fractures was thought to result from the child pulling at the surgical sites. | lack of efficacy and device intolerance, including symptomatic tachycardia, fever of unknown origin (1 each) and 2 with discomfort at the site |
| <b>Kirse, 2002<sup>e14</sup></b> | 102 patients (mean age 12 years 3 months, range 21 months–40 years with only 12 patients over age 18) |                                     | 4/3<br>4 patients (4%) had wound infections (1 treated with IV antibiotics (no explantation); 1 treated with IV antibiotics eventually                                                                                                                     | 1 patient had wound dehiscence from wrestling 9 days after implantation and was treated with IV then oral antibiotics. 5 patients (5%) had lead fracture. 4 of 46 patients who responded to a                                                                                   | None                                                                                                                                           |

| Author, year | Population | Method of obtaining adverse effects | No. wound infections/no. explanted due to wound infections                                                                                                                                                                                                                                                                                                 | Other adverse effects                                                                           | Explanted or turned off due to adverse effects |
|--------------|------------|-------------------------------------|------------------------------------------------------------------------------------------------------------------------------------------------------------------------------------------------------------------------------------------------------------------------------------------------------------------------------------------------------------|-------------------------------------------------------------------------------------------------|------------------------------------------------|
|              |            |                                     | <p>requiring explantation even after changing generator, 6 weeks later VNS was reimplanted successfully; 1 patient treated with antibiotics but eventually needed explantation and was reimplanted 2 months later; 1 patient treated with IV antibiotics, abscess eventually found thought to be due to patient scratching wound, device explanted and</p> | <p>follow-up questionnaire reported difficulty swallowing while the device was stimulating.</p> |                                                |

| Author, year                         | Population                                                                             | Method of obtaining adverse effects | No. wound infections/no. explanted due to wound infections                                                                                                                                            | Other adverse effects                                                                                                                                                                                                | Explanted or turned off due to adverse effects                                               |
|--------------------------------------|----------------------------------------------------------------------------------------|-------------------------------------|-------------------------------------------------------------------------------------------------------------------------------------------------------------------------------------------------------|----------------------------------------------------------------------------------------------------------------------------------------------------------------------------------------------------------------------|----------------------------------------------------------------------------------------------|
|                                      |                                                                                        |                                     | reimplanted 6 weeks later                                                                                                                                                                             |                                                                                                                                                                                                                      |                                                                                              |
| <b>Kabir, 2009<sup>e15</sup></b>     | N=69<br>Mean age 10.7 years, range 3–16 years                                          |                                     | 3/3<br>2 were implanted again later. 2 had fluid collections around the VNS treated with aspiration and antibiotics although the aspirates did not grow organisms. 1 of these required lead revision. | 2 other cases had lead fracture. 1 patient died due to unrelated causes.                                                                                                                                             | 1 patient had difficulty swallowing and 1 had the VNS turned off due to persistent neck pain |
| <b>Handforth, 1998<sup>e16</sup></b> | N=254 adult patients with refractory partial epilepsy (mean age 32, range 13–60 years) |                                     | 3/3 (1.2%)<br>1 was reimplanted later in the study (time frame not specified)                                                                                                                         | The frequency of other adverse events was “dose” related, greater at the highest-tolerated stimulation intensity vs the lowest-perceptible stimulation intensity: voice alteration 47.4% vs. 9.7%, dyspnea 11.6% vs. | 2                                                                                            |

| <b>Author, year</b> | <b>Population</b> | <b>Method of obtaining adverse effects</b> | <b>No. wound infections/no. explanted due to wound infections</b> | <b>Other adverse effects</b>        | <b>Explanted or turned off due to adverse effects</b> |
|---------------------|-------------------|--------------------------------------------|-------------------------------------------------------------------|-------------------------------------|-------------------------------------------------------|
|                     |                   |                                            |                                                                   | 1.0%, pharyngitis<br>15.8% vs. 3.9% |                                                       |

VNS = vagus nerve stimulation.

**Table e-3: Findings of case reports of complications from VNS use**

| <b>Author, year</b>                                                                                                                                        | <b>Complication</b>                                                        | <b>Description</b>                                                                                                                                                  |
|------------------------------------------------------------------------------------------------------------------------------------------------------------|----------------------------------------------------------------------------|---------------------------------------------------------------------------------------------------------------------------------------------------------------------|
| <b>Amark, 2007<sup>32</sup><br/>Iriarte, 2009<sup>33</sup><br/>Borusiak, 2009<sup>34</sup></b>                                                             | Late-onset bradycardia                                                     | 2.4, 6, and 9 years post-implant, resolved with VNS discontinuation                                                                                                 |
| <b>Ali, 2004<sup>35</sup><br/>Asconape, 1999<sup>36</sup><br/>Schuurman, 2009<sup>37</sup><br/>Tatum, 1999<sup>38</sup><br/>Ardesch, 2007<sup>39</sup></b> | Intraoperative bradycardia and asystole during implantation and initiation | Patients with intraoperative asystole. only 1 continued VNS therapy; VNS later activated in both of the patients with intraoperative bradycardia                    |
| <b>Sheck, 2011<sup>40</sup></b>                                                                                                                            | Episodic monocular blindness                                               | Theorized as vasospasm of left common carotid artery; treated successfully by decreasing the VNS stimulus intensity                                                 |
| <b>Cukiert, 2009<sup>e1</sup></b>                                                                                                                          | Extrapyramidal signs                                                       | Child with “double-cortex syndrome” treated for epilepsy. Reversed with VNS turned off and resumed when it was turned on; VNS effect on the basal ganglia theorized |
| <b>St Louis, 2010<sup>e2</sup></b>                                                                                                                         | Sleep-related stridor                                                      | Young woman with epilepsy. Resolved with reduction of current intensity                                                                                             |
| <b>Hajnšek, 2010<sup>e3</sup></b>                                                                                                                          | VNS-induced bronchospasm                                                   |                                                                                                                                                                     |
| <b>El Tahry, 2010<sup>e4</sup></b>                                                                                                                         | SUDEP                                                                      | 62-year-old woman 6 months post-VNS implant                                                                                                                         |
| <b>Gerson, 2011<sup>e5</sup></b>                                                                                                                           | Mania                                                                      | 19-year-old woman with JME and a history of unipolar depression. Resolved with temporary VNS discontinuation; VNS resumed without mania exacerbation                |
| <b>Murr, 2011<sup>e6</sup></b>                                                                                                                             | New, disabling seizure type                                                | 51-year-old man with refractory partial epilepsy. After VNS discontinuation and medication changes, the new, recurrent seizures stopped                             |
| <b>Spitz, 2010<sup>e7</sup></b>                                                                                                                            | Discontinuity in the silicone insulation over a VNS electrode              | Current leak to the phrenic nerve caused diaphragmatic dysfunction, inability to vocalize, and severe radiating pain into the jaw and upper                         |

| Author, year                                                                                                     | Complication    | Description                                                                                                                                                                                                                                                                                                                                                                                                                                                                                          |
|------------------------------------------------------------------------------------------------------------------|-----------------|------------------------------------------------------------------------------------------------------------------------------------------------------------------------------------------------------------------------------------------------------------------------------------------------------------------------------------------------------------------------------------------------------------------------------------------------------------------------------------------------------|
|                                                                                                                  |                 | incisor for the duration of each stimulation. Device explanted; symptomatic relief; new device implanted                                                                                                                                                                                                                                                                                                                                                                                             |
| <b>Marzec, 2003<sup>e8</sup></b><br><b>Ebben, 2008<sup>e9</sup></b>                                              | Increase in AHI | 16 patients, the average baseline AHI was 1.9, which increased to 4.2 after VNS activation <sup>e8</sup> ; CPAP titration in a patient with obstructive sleep apnea could not be achieved in the presence of the patient's standard VNS on/off cycling mode <sup>e9</sup>                                                                                                                                                                                                                            |
| <b>Chayasirisobhon, 2003<sup>30</sup></b><br><b>Amar, 1999<sup>e10</sup></b><br><b>Kawai, 2002<sup>e11</sup></b> | Other AEs       | 164 adult patients with partial epilepsy. At 21 months: Lead fracture (1.8%), transient voice alterations during stimulation (56%), unspecified pain (20%), headache (16%) (headache having not been reported previously at this rate <sup>30</sup> ); headache rate of 4.5% found in a 3-year follow-up study <sup>e10</sup><br>13 adults with partial epilepsy receiving long-term therapy. One patient found dead in the early morning of day 6 of therapy with no sign of seizure <sup>e11</sup> |

AE = adverse effect; AHI = apnea-hypopnea index; CPAP = continuous positive airway pressure; JME = juvenile myoclonic epilepsy; SUDEP = sudden unexpected death in epilepsy; VNS = vagus nerve stimulation.
